# Supplementary material
Source: Elsevier journal article supplement (https://www.sciencedirect.com/science/article/pii/S1134593419300430)
Supplement: mmc1 [file S1134593419300430:mmc1.docx]

Preguntas de autoevaluación:

1. La capacidad cognitiva puede depender de cómo las neuronas eficientes pueden regular la función sináptica y la plasticidad neuronal:
2. Durante el desarrollo cerebral prenatal.
3. Durante los 2 primeros años de vida.
4. Durante la infancia.
5. Durante la adolescencia.
6. A lo largo de todo el ciclo vital.

Respuesta correcta:

e. A lo largo de todo el ciclo vital.

La capacidad cognitiva puede depender de cómo las neuronas eficientes pueden regular la formación de nuevas sinapsis y la eliminación de otras, cambios en el citoesqueleto, la movilidad de receptores y el metabolismo energético.

1. Los circuitos neuronales asociados con una inteligencia superior parecen tener:
2. Un mayor número de neuronas de menor densidad con dendritas de mayor tamaño.
3. Un mayor número de neuronas de menor densidad con dendritas de menor tamaño.
4. Un mayor número de neuronas de mayor densidad con dendritas de mayor tamaño.
5. Un mayor número de neuronas de mayor densidad con dendritas de menor tamaño.
6. Un menor número de neuronas de menor densidad con dendritas de mayor tamaño.

Respuesta correcta:

a. Un mayor número de neuronas de menor densidad con dendritas de mayor tamaño.

A medida que disminuye la densidad de las neuritas aumenta la longitud dendrítica, por lo que los circuitos neuronales asociados con una inteligencia superior parecen estar organizados de una manera más dispersa y eficiente debido a un mayor número de neuronas de menor densidad con dendritas de mayor tamaño.

1. Una maduración precoz en las áreas prefrontales y parietales puede facilitar:
2. La atención selectiva.
3. Una memoria de trabajo más eficaz.
4. Una mayor flexibilización cognitiva.
5. Una mayor planificación/resolución de las tareas.
6. Todas son correctas

Respuesta correcta:

b. Todas son correctas.

Una maduración precoz de estas áreas implica una mielinización y una complejidad mayor en las redes neuronales que puede estar facilitando la atención selectiva, un mayor uso de estrategias cognitivas de orden superior, una memoria de trabajo más eficaz, una mayor flexibilización, planificación/resolución de las tareas y, en definitiva, un rendimiento ejecutivo mayor y un alto grado de pensamiento abstracto y divergente

1. El menor esfuerzo cognitivo y consumo metabólico que muestran las personas con AC durante la realización de tares desafiantes, con respecto a sujetos sin AC, está asociado con:
2. Una mayor activación en el lóbulo frontal.
3. Una mayor activación en regiones parietales.
4. Una menor activación en áreas frontales y parietales.
5. Una mayor activación frontal y una menor activación parietal.
6. Todas son incorrectas.

Respuesta correcta:

b. Una mayor activación en regiones parietales

Cuando los sujetos con AC realizan tareas desafiantes son más precisos y selectivos, mostrando una mayor actividad neuronal relacionada con las demandas de la tarea en las regiones parietales, sugiriendo que hacen un mayor uso de recursos neuronales automatizados que los sujetos sin AC, quienes muestran una mayor activación frontal, y por lo tanto un mayor esfuerzo y consumo metabólico.

1. La teoría de grafos muestra el cerebro altamente inteligente:
2. un enfoque atencional en los fenómenos sensoriales de bajo nivel
3. un enfoque atencional en la interacción social.
4. el refinamiento excesivo de procesos de bajo nivel
5. el refinamiento excesivo de procesos de nivel superior
6. a y c son correctas

Respuesta correcta:

e. a y c son correctas

La EPF afirma que una respuesta intensificada a la estimulación sensorial desde la infancia conduce a un enfoque atencional en los fenómenos sensoriales de bajo nivel, a expensas de la interacción social, y al refinamiento excesivo de procesos de bajo nivel a expensas de procesos de nivel superior.

1. Las características arquitectónicas de la red de conectividad de un cerebro adolescente altamente inteligente son:
2. Un mayor número de conexiones de clubes ricos que optimizan la eficiencia de la comunicación global.
3. Una red de conectividad con estructuras altamente agrupadas.
4. Una transferencia de información paralela más eficiente.
5. Una red de conexión local menor.
6. b y c son correctas.

Respuesta correcta:

e. b y c son correctas.

En general, los sujetos con AC muestran una transferencia de información paralela más eficiente. Estudios recientes han encontrado que los adolescentes con AC muestran una eficiencia baja en los clubes ricos y una mayor eficiencia, con un menor coste de cableado, en las conexiones locales.
